# Supplementary material
Source: HighWire-hosted journal article supplement (https://ard.bmj.com/content/annrheumdis-2021-221323)
Supplement: inline-supplementary-material-1 [file inline-supplementary-material-1.pdf]

**Supplementary Material****Baricitinib further enhances disease modifying effects by uncoupling the link between disease activity and joint structural progression in patients with rheumatoid arthritis.**

Pedro López-Romero, Inmaculada de la Torre, Ewa Haladyj, Daniel Aletaha, Josef S Smolen

Supplemental Table 1A and B. CDAI change from baseline in patients with averaged CDAI >10 in RA-BEAM (MTX-IR patients with established RA) and RA-BEGIN (csDMARD naïve patients with early RA).

| <b>RA-BEAM</b>                                  |  |             |             |             |
|-------------------------------------------------|--|-------------|-------------|-------------|
|                                                 |  | PBO         | Bari 4 mg   | ADA         |
| Average CDAI>10 up to week 24                   |  |             |             |             |
| N (%)                                           |  | 257 (39.1%) | 236 (35.9%) | 164 (25.0%) |
| Change from baseline in CDAI <sup>a</sup>       |  | -17.26      | -22.78      | -22.30      |
| Difference vs. PBO                              |  | -           | -5.52       | -5.03       |
| P-value vs. PBO                                 |  | -           | <0.001      | <0.001      |
| <b>Change from baseline in mTSS<sup>b</sup></b> |  |             |             |             |
| CDAI >10                                        |  | 0.84        | 0.34        | 0.28        |
| CDAI ≤10                                        |  | 0.31        | 0.24        | 0.15        |
| Within group p-value                            |  | 0.02        | 0.6         | 0.5         |

<sup>a</sup>Observed values. <sup>b</sup>Adjusted values. ADA=adalimumab; bari=baricitinib; CDAI=clinical disease activity index; IR=inadequate response; mTSS=modified Total Sharp Score; PBO=PBO; RA=rheumatoid arthritis.

| <b>RA-BEGIN</b>                                 |  |            |            |                 |
|-------------------------------------------------|--|------------|------------|-----------------|
|                                                 |  | MTX        | Bari 4 mg  | Bari 4 mg + MTX |
| Average CDAI>10 up to week 52                   |  |            |            |                 |
| N (%)                                           |  | 81 (41.3%) | 53 (27.0%) | 62 (31.6%)      |
| Change from baseline in CDAI <sup>a</sup>       |  | -24.77     | -26.41     | -27.04          |
| Difference vs. MTX                              |  | -          | -1.65      | -2.27           |
| P-value vs. MTX                                 |  | -          | 0.196      | 0.062           |
| <b>Change from baseline in mTSS<sup>b</sup></b> |  |            |            |                 |
| CDAI >10                                        |  | 1.69       | 1.05       | 0.50            |
| CDAI ≤10                                        |  | 0.43       | 0.39       | 0.28            |
| Within group p-value                            |  | <0.001     | 0.07       | 0.5             |

<sup>a</sup>Observed values. <sup>b</sup>Adjusted values. bari=baricitinib; CDAI=clinical disease activity index; csDMARD=conventional synthetic disease modifying antirheumatic drugs; mTSS=modified Total Sharp Score; MTX=methotrexate; RA=rheumatoid arthritis.

Supplemental Table 2A and B. hsCRP change from baseline in patients with averaged hsCRP >5 mg/L in RA-BEAM (MTX-IR patients with established RA) and RA-BEGIN (csDMARD naïve patients with early RA).

| RA-BEAM                                    |               |             |             |             |
|--------------------------------------------|---------------|-------------|-------------|-------------|
|                                            |               | PBO         | Bari 4 mg   | ADA         |
| Average hsCRP >5 mg/L up to week 24        |               |             |             |             |
| N (%)                                      |               | 257 (50.1%) | 149 (29.0%) | 107 (20.9%) |
| Change from baseline in hsCRP <sup>a</sup> |               | -2.23       | -8.84       | -2.98       |
| Difference vs. PBO                         |               | -           | -6.61       | -0.75       |
| P-value vs. PBO                            |               | -           | <0.001      | 0.636       |
| Change from baseline in mTSS <sup>b</sup>  | hsCRP >5 mg/L | 0.85        | 0.40        | 0.30        |
|                                            | hsCRP ≤5 mg/L | 0.37        | 0.21        | 0.17        |
| Within group p-value                       |               | 0.03        | 0.3         | 0.5         |

<sup>a</sup>Observed values. <sup>b</sup>Adjusted values. ADA=adalimumab; bari=baricitinib; hsCRP=high sensitivity C-reactive protein; IR, inadequate response; mTSS=modified Total Sharp Score; PBO=PBO; RA=rheumatoid arthritis.

| RA-BEGIN                                   |               |            |            |                 |
|--------------------------------------------|---------------|------------|------------|-----------------|
|                                            |               | MTX        | Bari 4 mg  | Bari 4 mg + MTX |
| Average hsCRP >5 mg/L up to week 52        |               |            |            |                 |
| N (%)                                      |               | 81 (44.5%) | 54 (29.7%) | 47 (25.8%)      |
| Change from baseline in hsCRP <sup>a</sup> |               | -9.44      | -11.15     | -13.37          |
| Difference vs. MTX                         |               | -          | -1.71      | -3.94           |
| P-value vs. MTX                            |               | -          | 0.354      | 0.045           |
| Change from baseline in mTSS <sup>b</sup>  | hsCRP >5 mg/L | 1.51       | 1.20       | -0.15           |
|                                            | hsCRP ≤5 mg/L | 0.77       | 0.31       | 0.52            |
| Within group p-value                       |               | 0.03       | 0.01       | 0.06            |

<sup>a</sup>Observed values. <sup>b</sup>Adjusted values. bari=baricitinib; csDMARD=conventional synthetic disease modifying antirheumatic drugs; hsCRP, high sensitivity C-reactive protein; mTSS=modified Total Sharp Score; MTX=methotrexate; RA=rheumatoid arthritis.
